# Supplementary material for: Fluctuating Asymmetry in the Polymorphic Sand Cricket (Gryllus firmus): Are More Functionally Important Structures Always More Symmetric?
Source: Insects. 2022 Jul 16;13(7):640. doi: 10.3390/insects13070640 (PMC9319220; doi:10.3390/insects13070640)
Supplement: Supplementary file 1 [file insects-13-00640-s001.zip]

Archive with 6 entries (6 files):
- Figure S1.pdf
- Table S1 UPDATED-GR.xlsx
- Table S2 UPDATED-GR.xlsx
- Table S3 UPDATED-GR.xlsx
- Table S4 UPDATED-GR.xlsx
- Table S5 - UPDATED-GR.xlsx
