# Supplementary material for: Fluctuating Asymmetry in the Polymorphic Sand Cricket (Gryllus firmus): Are More Functionally Important Structures Always More Symmetric?
Source: Insects. 2022 Jul 16;13(7):640. doi: 10.3390/insects13070640 (PMC9319220; doi:10.3390/insects13070640)
Supplement: Supplementary file 1 [file insects-13-00640-s001.zip › Table S1 UPDATED-GR.xlsx]

## Sheet: Sheet1
Table S1. ANOVA results of Size Analyses.
Traits		ANOVA (Size)							TukeyHSD P-values (Size)
Pronotum (i.e. body size)			DF	SS	MS	F	P			F-LW	F-SW	M-LW	M-SW
		Sex	1	6.77424	6.77424	77.4578	2.5976e-15		F-LW
		Morph	1	0.18647	0.18647	2.1321	0.14628		F-SW	0.575902
		Sex:Morph	1	0.00854	0.00854	0.09764	0.75511		M-LW	0	6.1e-06
		Residuals	154	13.4684	0.08746				M-SW	0	8e-07	0.869629
Front Femur			DF	SS	MS	F	P			F-LW	F-SW	M-LW	M-SW
		Sex	1	0.58109	0.581086	7.25785	0.0079164		F-LW
		Morph	1	0.50876	0.508758	6.35447	0.0128219		F-SW	0.960334
		Sex:Morph	1	0.29207	0.292066	3.64796	0.0581687		M-LW	0.874407	0.996835
		Residuals	141	11.2889	0.080063				M-SW	0.0007885	0.0104062	0.011511
Front Tibia			DF	SS	MS	F	P			F-LW	F-SW	M-LW	M-SW
		Sex	1	0.22334	0.223343	3.37329	0.0683975		F-LW
		Morph	1	0.94636	0.946357	14.2934	0.00023144		F-SW	0.288618
		Sex:Morph	1	0.13365	0.133646	2.01854	0.157628		M-LW	0.97375	0.5475
		Residuals	139	9.20309	0.066209				M-SW	0.000354	0.116036	0.0022509
Hind Femur			DF	SS	MS	F	P			F-LW	F-SW	M-LW	M-SW
		Sex	1	29.1094	29.1094	39.9723	3.3321e-09		F-LW
		Morph	1	10.3487	10.3487	14.2106	0.0002415		F-SW	0.174275
		Sex:Morph	1	0.7752	0.77522	1.06452	0.303992		M-LW	0.0006586	0.281897
		Residuals	138	100.497	0.72824				M-SW	0	1.05e-05	0.0061387
Hind Tibia			DF	SS	MS	F	P			F-LW	F-SW	M-LW	M-SW
		Sex	1	16.175	16.175	36.7077	1.2335e-08		F-LW
		Morph	1	9.1814	9.18137	20.8362	1.0961e-05		F-SW	0.030734
		Sex:Morph	1	0.2416	0.24164	0.54838	0.46024		M-LW	0.0005021	0.696778
		Residuals	138	60.8088	0.44064				M-SW	0	5.52e-05	0.0017987
Hindwing			DF	SS	MS	F	P			F-LW	F-SW	M-LW	M-SW
		Sex	1	54.85	54.85	58.4074	3.7651e-12		F-LW
		Morph	1	4253.38	4253.38	4529.16	2.22e-16		F-SW	0
		Sex:Morph	1	0.85	0.85	0.9083	0.34229		M-LW	0.0039868	0
		Residuals	133	124.9	0.94				M-SW	0	8.3e-05	0
Mandible			DF	SS	MS	F	P			F-LW	F-SW	M-LW	M-SW
		Sex	1	6.34493	6.34493	77.9864	2.7482e-15		F-LW
		Morph	1	0.92315	0.92315	11.3465	0.00096374		F-SW	0.785864
		Sex:Morph	1	0.36432	0.36432	4.47786	0.0360104		M-LW	0	0
		Residuals	148	12.0412	0.08136				M-SW	0.0015016	0.0001908	0.0009399
Maxilla			DF	SS	MS	F	P			F-LW	F-SW	M-LW	M-SW
		Sex	1	6.33458	6.33458	141.74	2.22e-16		F-LW
		Morph	1	0.6519	0.6519	14.5868	0.00019544		F-SW	0.904548
		Sex:Morph	1	0.41021	0.41021	9.17864	0.00288426		M-LW	0	0
		Residuals	150	6.70373	0.04469				M-SW	2.6e-06	6e-07	1.99e-05
Tympanum			DF	SS	MS	F	P			F-LW	F-SW	M-LW	M-SW
		Sex	1	0.0024566	0.0024566	1.81849	0.179655		F-LW
		Morph	1	0.0450052	0.0450052	33.3147	4.784e-08		F-SW	0.0195743
		Sex:Morph	1	0.0041652	0.0041652	3.08321	0.081276		M-LW	0.995417	0.0135452
		Residuals	141	0.190479	0.0013509				M-SW	4e-06	0.155344	3e-06
