# Supplementary material for: Fluctuating Asymmetry in the Polymorphic Sand Cricket (Gryllus firmus): Are More Functionally Important Structures Always More Symmetric?
Source: Insects. 2022 Jul 16;13(7):640. doi: 10.3390/insects13070640 (PMC9319220; doi:10.3390/insects13070640)
Supplement: Supplementary file 1 [file insects-13-00640-s001.zip › Table S2 UPDATED-GR.xlsx]

## Sheet: Sheet1
Table S2. Descriptive statistics of assumptions
Traits		Sample Size		Size dependence of scaled values			Shapiro-Wilk normality test (Corrected FA)
Front Femur		N		Slope	P		W	P
Female Longwing		45		-0.719011	0.7292		0.9749	0.43
Female Shortwing		31		-2.32113	0.4998		0.95691	0.2412
Male Longwing		39		0.967853	0.7991		0.96316	0.2269
Male Shortwing		30		0.595353	0.8737		0.95395	0.2154
Front Tibia		N		Slope	P		W	P
Female Longwing		44		-1.06367	0.5492		0.95664	0.09743
Female Shortwing		32		4.63754	0.07591		0.94917	0.1365
Male Longwing		38		0.141503	0.9539		0.95935	0.1807
Male Shortwing		29		-3.76359	0.3303		0.9414	0.1091
Hind Femur		N		Slope	P		W	P
Female Longwing		42		-6.55494	0.6634		0.95202	0.07634
Female Shortwing		34		-26.7845	0.2339		0.96542	0.3472
Male Longwing		36		6.47624	0.7117		0.97259	0.5003
Male Shortwing		30		-8.47071	0.4532		0.93966	0.08908
Hind Tibia		N		Slope	P		W	P
Female Longwing		41		-9.84588	0.1538		0.95134	0.07798
Female Shortwing		33		3.39106	0.7324		0.96112	0.278
Male Longwing		38		3.87972	0.5762		0.96279	0.2337
Male Shortwing		30		-2.02151	0.8364		0.95223	0.1939
Hindwing		N		Slope	P		W	P
Female Longwing		41		-3.52469	0.7918		0.95673	0.1208
Female Shortwing		33		3.2286	0.6684		0.96043	0.2658
Male Longwing		33		-50.0046	0.05574		0.95236	0.1558
Male Shortwing		30		-9.75332	0.1965		0.95447	0.2224
Mandible		N		Slope	P		W	P
Female Longwing		47		-0.609563	0.8176		0.98028	0.604
Female Shortwing		32		-4.18495	0.1989		0.9572	0.23
Male Longwing		40		12.3973	0.0243		0.98899	0.96
Male Shortwing		33		-3.31505	0.681		0.94806	0.1167
Maxilla		N		Slope	P		W	P
Female Longwing		46		-0.759736	0.3164		0.98959	0.951
Female Shortwing		35		-0.254929	0.8312		0.94208	0.06478
Male Longwing		41		2.73717	0.4134		0.97642	0.543
Male Shortwing		32		5.59335	0.09182		0.95663	0.2217
Tympanum		N		Slope	P		W	P
Female Longwing		45		-0.0689881	0.08574		0.98583	0.8498
Female Shortwing		31		-0.0113722	0.8523		0.96995	0.5176
Male Longwing		39		-0.0344531	0.4812		0.9625	0.2158
Male Shortwing		30		0.0127537	0.7264		0.97558	0.6997
