# Supplementary material for: Fluctuating Asymmetry in the Polymorphic Sand Cricket (Gryllus firmus): Are More Functionally Important Structures Always More Symmetric?
Source: Insects. 2022 Jul 16;13(7):640. doi: 10.3390/insects13070640 (PMC9319220; doi:10.3390/insects13070640)
Supplement: Supplementary file 1 [file insects-13-00640-s001.zip › Table S3 UPDATED-GR.xlsx]

## Sheet: Sheet1
Table S3. ANOVA results of Corrected FA Analyses.
Traits		ANOVA (Corrected FA)							TukeyHSD P-values (Corrected FA)
Front Femur			DF	SS	MS	F	P			F-LW	F-SW	M-LW	M-SW
		Sex	1	0.005978	0.00597842	2.43034	0.121249		F-LW
		Morph	1	0.002883	0.00288296	1.17197	0.280844		F-SW	0.769215
		Sex:Morph	1	0.015618	0.0156177	6.34889	0.012861		M-LW	0.0260449	0.354705
		Residuals	141	0.346848	0.00245992				M-SW	1	0.812892	0.0543865
Front Tibia			DF	SS	MS	F	P			F-LW	F-SW	M-LW	M-SW
		Sex	1	0.002198	0.00219827	0.60556	0.43779		F-LW
		Morph	1	0.002537	0.00253707	0.69889	0.40459		F-SW	0.734596
		Sex:Morph	1	0.001345	0.00134489	0.37048	0.54374		M-LW	0.997217	0.642605
		Residuals	139	0.504588	0.00363013				M-SW	0.999956	0.763463	0.999206
Hind Femur			DF	SS	MS	F	P			F-LW	F-SW	M-LW	M-SW
		Sex	1	0.0075171	0.00751714	3.66063	0.057784		F-LW
		Morph	1	0.0058181	0.00581805	2.83322	0.094594		F-SW	0.984522
		Sex:Morph	1	0.0110997	0.0110997	5.40525	0.021535		M-LW	0.99871	0.997261
		Residuals	138	0.283384	0.00205351				M-SW	0.0295018	0.0167479	0.0258008
Hind Tibia			DF	SS	MS	F	P			F-LW	F-SW	M-LW	M-SW
		Sex	1	0.001921	0.00192107	0.67889	0.41139		F-LW
		Morph	1	9.9e-05	9.8909e-05	0.03495	0.85197		F-SW	0.910423
		Sex:Morph	1	0.001655	0.00165519	0.58493	0.44569		M-LW	0.999587	0.875813
		Residuals	138	0.390503	0.00282973				M-SW	0.95211	0.678687	0.974449
Hindwing			DF	SS	MS	F	P			F-LW	F-SW	M-LW	M-SW
		Sex	1	3e-06	3.08e-06	0.00117	0.97276		F-LW
		Morph	1	0.005217	0.00521706	1.98063	0.16166		F-SW	0.966115
		Sex:Morph	1	0.001819	0.00181894	0.69055	0.40747		M-LW	0.940523	0.757515
		Residuals	133	0.350327	0.00263404				M-SW	0.697131	0.930735	0.401439
Mandible			DF	SS	MS	F	P			F-LW	F-SW	M-LW	M-SW
		Sex	1	0.0014394	0.00143945	1.13756	0.28791		F-LW
		Morph	1	0.0019015	0.0019015	1.50271	0.2222		F-SW	0.956891
		Sex:Morph	1	0.0003539	0.000353917	0.27969	0.5977		M-LW	0.630761	0.395546
		Residuals	148	0.187277	0.00126538				M-SW	0.998888	0.98683	0.606098
Maxilla			DF	SS	MS	F	P			F-LW	F-SW	M-LW	M-SW
		Sex	1	0.021625	0.0216254	7.54318	0.0067615		F-LW
		Morph	1	0.002265	0.00226485	0.79001	0.375521		F-SW	0.999958
		Sex:Morph	1	0.002139	0.00213932	0.74622	0.389055		M-LW	0.0451142	0.062495
		Residuals	150	0.430031	0.00286688				M-SW	0.632755	0.648688	0.60344
Tympanum			DF	SS	MS	F	P			F-LW	F-SW	M-LW	M-SW
		Sex	1	0.03029	0.0302947	1.23982	0.2674		F-LW
		Morph	1	0.09299	0.0929911	3.8057	0.0530615		F-SW	0.780593
		Sex:Morph	1	0.28138	0.281381	11.5157	0.0008962		M-LW	0.502612	0.984667
		Residuals	141	3.44529	0.0244347				M-SW	0.0480027	0.0073424	0.0012235
