# Supplementary material for: Fluctuating Asymmetry in the Polymorphic Sand Cricket (Gryllus firmus): Are More Functionally Important Structures Always More Symmetric?
Source: Insects. 2022 Jul 16;13(7):640. doi: 10.3390/insects13070640 (PMC9319220; doi:10.3390/insects13070640)
Supplement: Supplementary file 1 [file insects-13-00640-s001.zip › Table S4 UPDATED-GR.xlsx]

## Sheet: Sheet1
Table S4. Correlation between percent body fat and FA traits.
Traits	N	t	df	r	P
Front Femur	137	-0.43611	135	-0.0375083	0.6635
Female Longwing	44	-1.005	42	-0.153237	0.3207
Female Shortwing	28	0.78222	26	0.151631	0.4412
Male Longwing	36	-1.0352	34	-0.174797	0.3079
Male Shortwing	29	1.2494	27	0.233793	0.2222
Front Tibia	135	1.494	133	0.128471	0.1375
Female Longwing	43	0.85904	41	0.132968	0.3953
Female Shortwing	29	1.2757	27	0.238423	0.2129
Male Longwing	35	-0.14123	33	-0.0245774	0.8885
Male Shortwing	28	0.52872	26	0.103137	0.6015
Hind Femur	135	-2.0045	133	-0.171247	0.04704
Female Longwing	42	-1.14	40	-0.177392	0.2611
Female Shortwing	31	-1.2353	29	-0.22358	0.2266
Male Longwing	33	-1.4895	31	-0.258428	0.1465
Male Shortwing	29	-0.51688	27	-0.0989859	0.6094
Hind Tibia	134	0.34667	132	0.0301603	0.7294
Female Longwing	41	1.7326	39	0.267341	0.09107
Female Shortwing	30	-1.4214	28	-0.25943	0.1662
Male Longwing	34	0.9881	32	0.172068	0.3305
Male Shortwing	29	-0.92327	27	-0.174944	0.364
Hindwing	130	-1.4874	128	-0.13035	0.1394
Female Longwing	41	-0.0071391	39	-0.00114317	0.9943
Female Shortwing	30	0.1263	28	0.0238625	0.9004
Male Longwing	29	0.10596	27	0.0203884	0.9164
Male Shortwing	30	-1.556	28	-0.282109	0.1309
Mandible	144	2.0246	142	0.167502	0.04478
Female Longwing	46	0.15704	44	0.0236683	0.8759
Female Shortwing	29	0.28949	27	0.0556256	0.7744
Male Longwing	37	0.69138	35	0.116074	0.4939
Male Shortwing	32	1.728	30	0.300877	0.09426
Maxilla	145	0.029401	143	0.0024586	0.9766
Female Longwing	45	3.3303	43	0.452817	0.001788
Female Shortwing	32	-1.3259	30	-0.235279	0.1949
Male Longwing	38	1.1396	36	0.186592	0.262
Male Shortwing	30	0.11996	28	0.0226646	0.9054
Tympanum	135	-0.53163	133	-0.0460491	0.5959
Female Longwing	42	-1.1852	40	-0.184183	0.243
Female Shortwing	28	-0.27844	26	-0.0545261	0.7829
Male Longwing	36	1.7869	34	0.292997	0.08288
Male Shortwing	29	-0.0040747	27	-0.000784182	0.9968
Significant results are bolded.
