# Supplementary material for: Fluctuating Asymmetry in the Polymorphic Sand Cricket (Gryllus firmus): Are More Functionally Important Structures Always More Symmetric?
Source: Insects. 2022 Jul 16;13(7):640. doi: 10.3390/insects13070640 (PMC9319220; doi:10.3390/insects13070640)
Supplement: Supplementary file 1 [file insects-13-00640-s001.zip › Table S5 - UPDATED-GR.xlsx]

## Sheet: Sheet1
Table S5. Results of GMM analyses on forewing shape.
Female LW
	Df	SS	MS	R2	F	Z	P
Ind	32	0.3044	0.0095126	0.60455	2.1326	-0.8486	0.796
Side	1	0.0022	0.0021969	0.00436	0.4925	-0.4482	0.673
Ind:Side	32	0.14274	0.0044606	0.28348	10.8669	11.1922	0.001
Ind:Side:Replicate	132	0.05418	0.0004105	0.10761
Total	197	0.50352
Female SW
	Df	SS	MS	R2	F	Z	P
Ind	28	0.26044	0.0093015	0.63709	2.9373	0.2343	0.409
Side	1	0.0009	0.000901	0.0022	0.2845	-1.1924	0.89
Ind:Side	28	0.08867	0.0031667	0.2169	6.2482	9.7339	0.001
Ind:Side:Replicate	116	0.05879	0.0005068	0.14381
Total	173	0.4088
Male LW
	Df	SS	MS	R2	F	Z	P
Ind	26	0.172789	0.0066457	0.59299	3.5109	1.636	0.066
Side	1	0.00799	0.0079903	0.02742	4.2212	2.3955	0.008
Ind:Side	26	0.049216	0.0018929	0.1689	3.3299	8.594	0.001
Ind:Side:Replicate	108	0.061393	0.0005685	0.21069
Total	161	0.291388
Male SW
	Df	SS	MS	R2	F	Z	P
Ind	24	0.197753	0.0082397	0.65126	3.7513	1.2235	0.114
Side	1	0.009621	0.0096213	0.03169	4.3804	2.8187	0.002
Ind:Side	24	0.052715	0.0021965	0.17361	5.043	9.7781	0.001
Ind:Side:Replicate	100	0.043555	0.0004355	0.14344
Total	149	0.303644
